# Supplementary material for: A lipoprotein/β-barrel complex monitors lipopolysaccharide integrity transducing information across the outer membrane
Source: eLife journal article supplement (doi:10.7554/elife.15276), 2016-06-10
Supplement: supp [file elife_poa_e15276_Figure_3_figure_supplement_1.pdf › elife_poa_e15276_Figure_3_figure_supplement_1.pdf]

A

PMB MIC in LB at different cell densities, mean +/- SD, n=3

| 5*10 <sup>8</sup> cell/ml (used in all of the experiments) |         |         | 10 <sup>5</sup> cell/ml (standard) |              |              |
|------------------------------------------------------------|---------|---------|------------------------------------|--------------|--------------|
| WT                                                         | ompA    | bamE    | WT                                 | ompA         | bamE         |
| 10+/- 0                                                    | 10+/- 0 | 10+/- 0 | 0.42+/- 0.18                       | 0.52+/- 0.18 | 0.42+/- 0.18 |

B

untreated

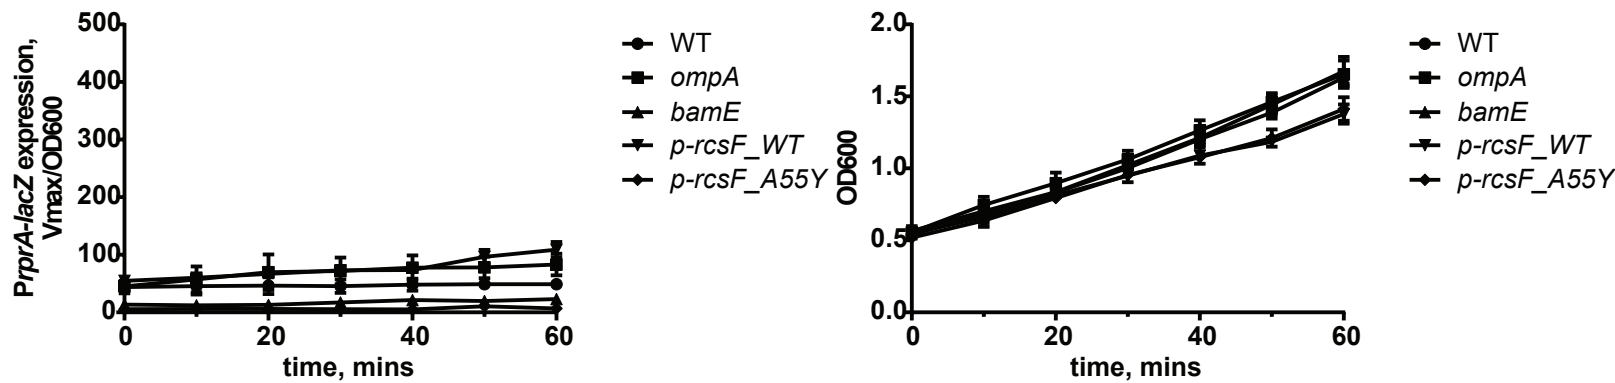

PMB treatment

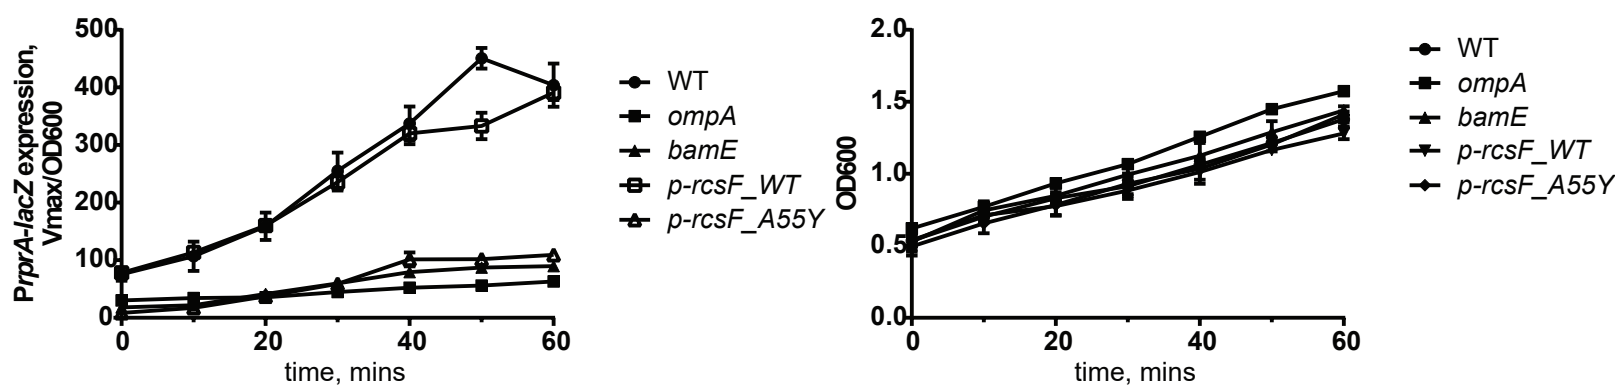

Glb treatment

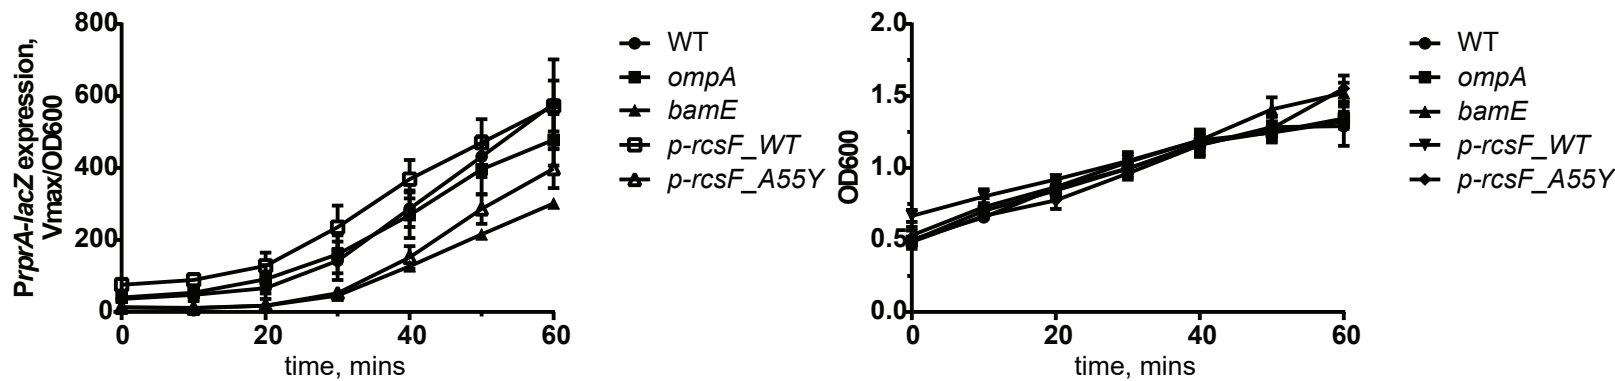

Figure 3- Figure supplement 1
