# Supplementary figures and images for: A lipoprotein/β-barrel complex monitors lipopolysaccharide integrity transducing information across the outer membrane
Source: eLife journal article supplement (doi:10.7554/elife.15276), 2016-06-10

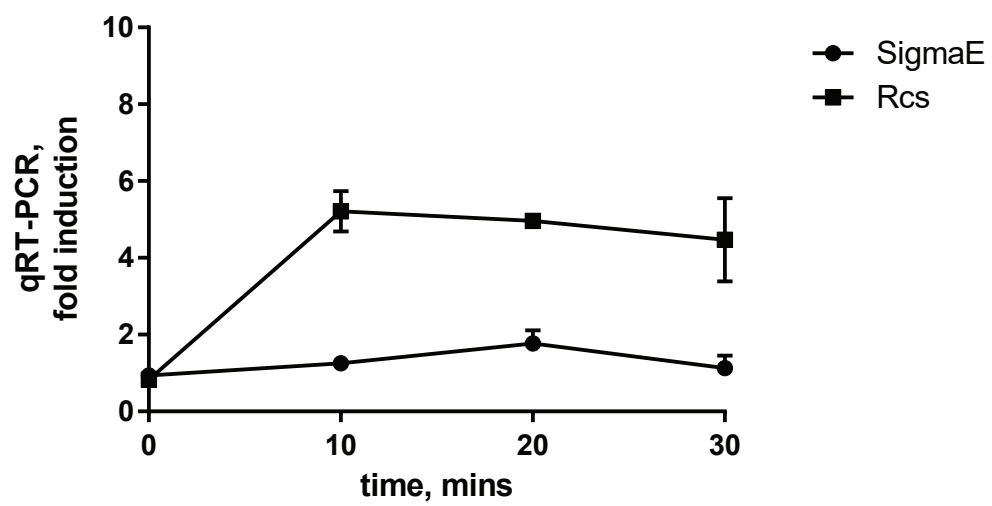

Figure 1- Figure supplement 1

Supplement: supp [file elife_poa_e15276_Figure_1_figure_supplement_1.pdf › elife_poa_e15276_Figure_1_figure_supplement_1.pdf]

**A**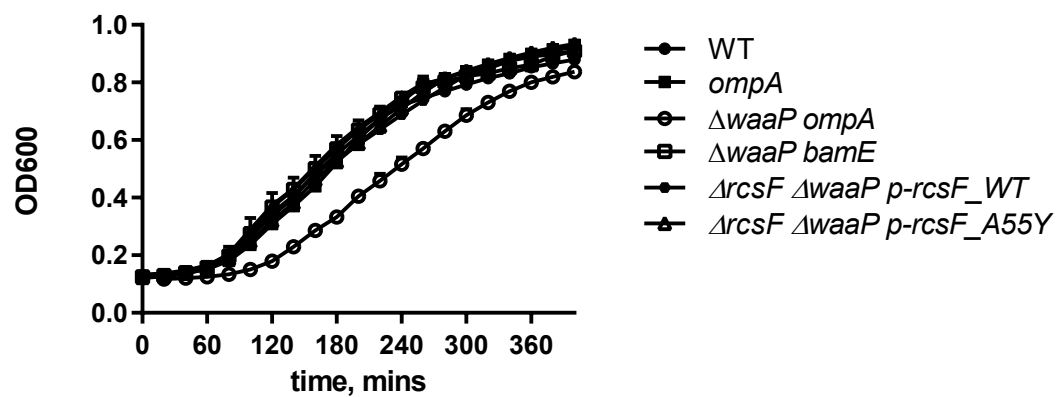**B**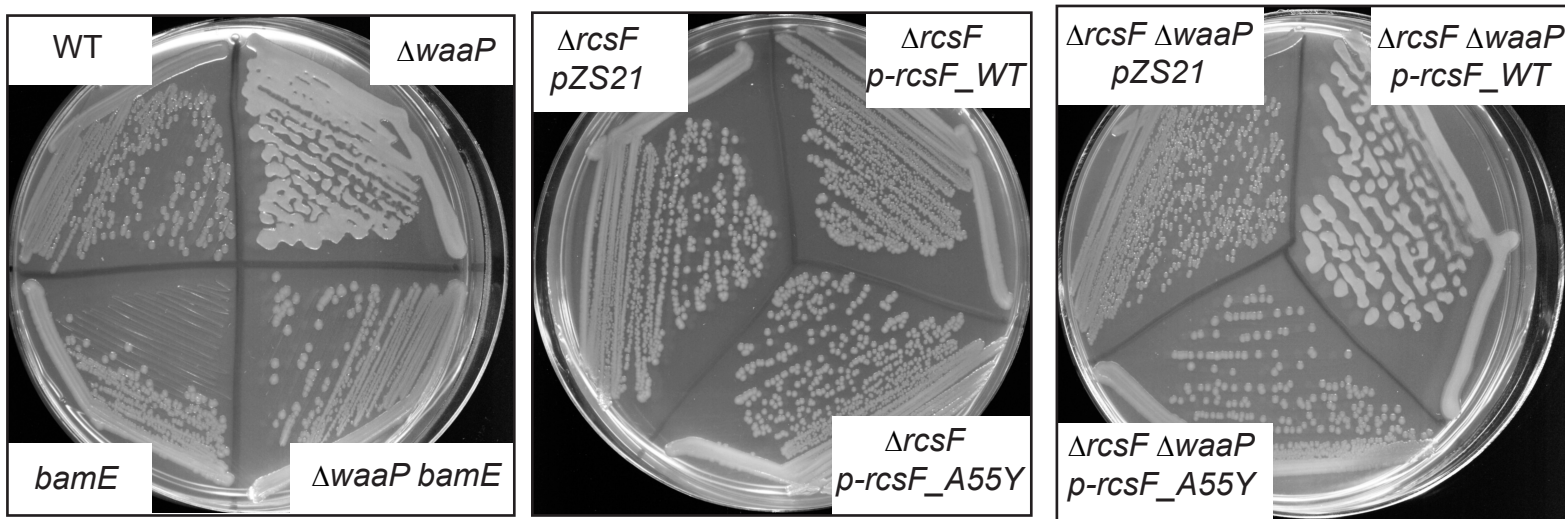

Figure 3- Figure supplement 2

Supplement: supp [file elife_poa_e15276_Figure_3_figure_supplement_2.pdf › elife_poa_e15276_Figure_3_figure_supplement_2.pdf]

untreated

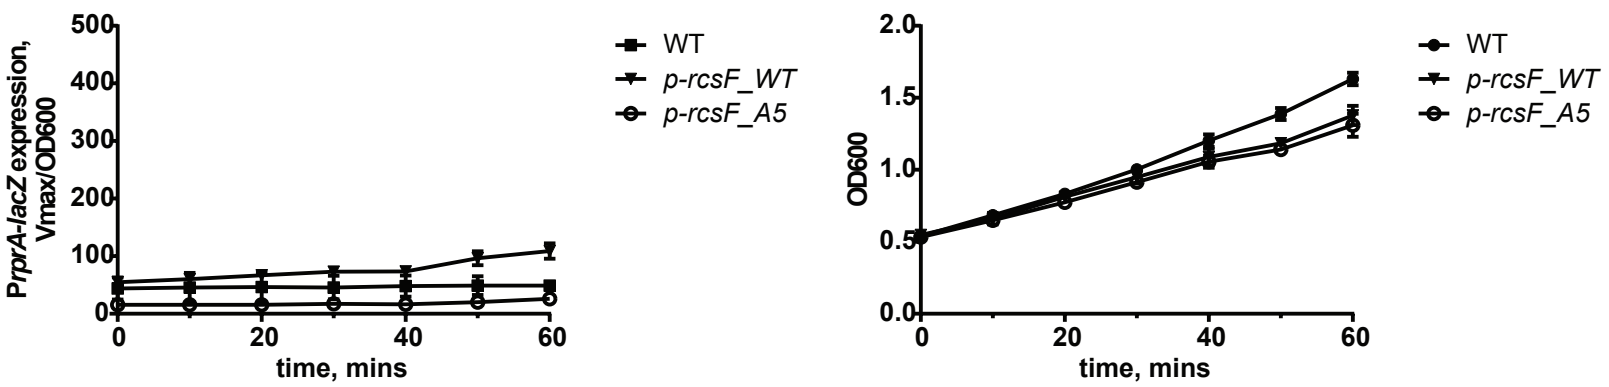

PMB treatment

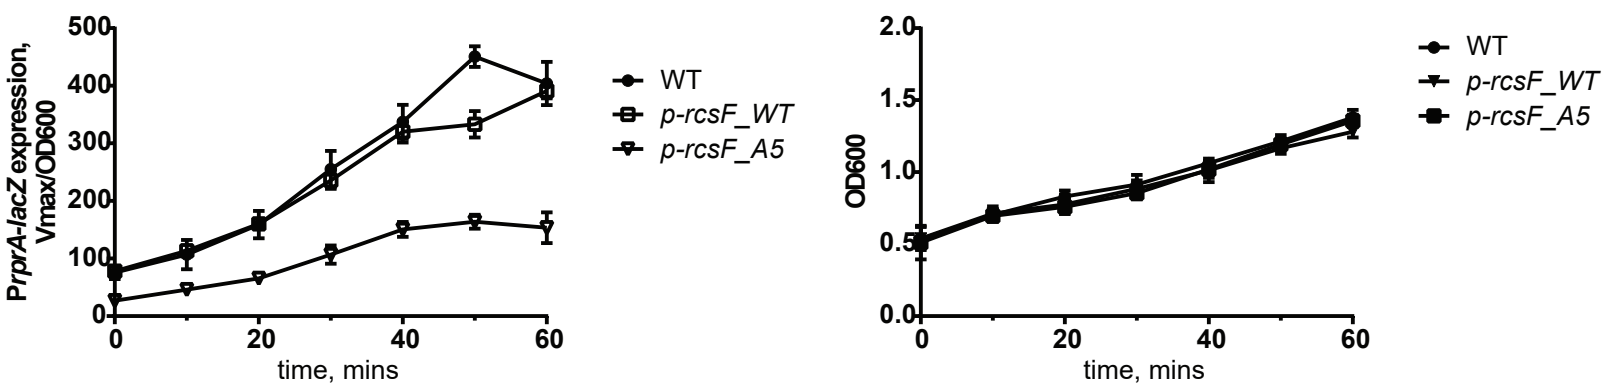

Glb treatment

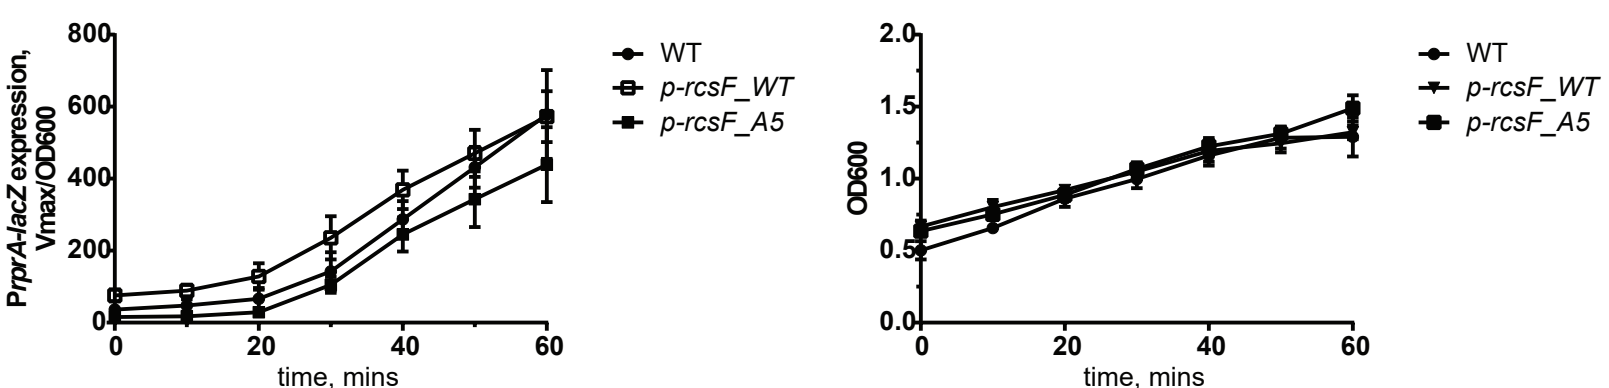

Figure 5- Figure supplement 1

Supplement: supp [file elife_poa_e15276_Figure_5_figure_supplement_1.pdf › elife_poa_e15276_Figure_5_figure_supplement_1.pdf]

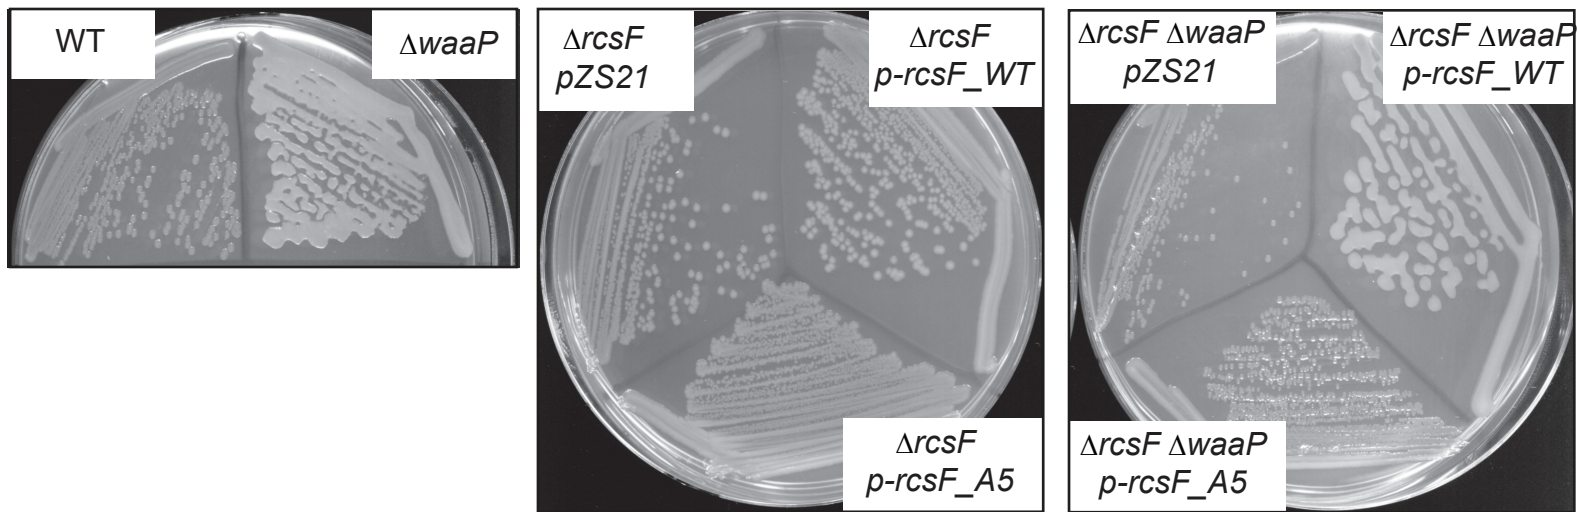

Figure 5- Figure supplement 2

Supplement: supp [file elife_poa_e15276_Figure_5_figure_supplement_2.pdf › elife_poa_e15276_Figure_5_figure_supplement_2.pdf]
